# Supplementary material for: Structure and engineering of the minimal type VI CRISPR-Cas13bt3
Source: PubMed Central journal article supplement (PMC7613696; doi:10.1016/j.molcel.2022.08.001), 2022-08-25
Supplement: EMS155324-supplement-Figures_S1_S7___Table_S1.pdf [file EMS155324-supplement-Figures_S1_S7___Table_S1.pdf]

**Molecular Cell, Volume 82**

**Supplemental information**

**Structure and engineering of the minimal  
type VI CRISPR-Cas13bt3**

**Ryoya Nakagawa, Soumya Kannan, Han Altae-Tran, Satoru N. Takeda, Atsuhiko Tomita, Hisato Hirano, Tsukasa Kusakizako, Tomohiro Nishizawa, Keitaro Yamashita, Feng Zhang, Hiroshi Nishimasu, and Osamu Nureki**

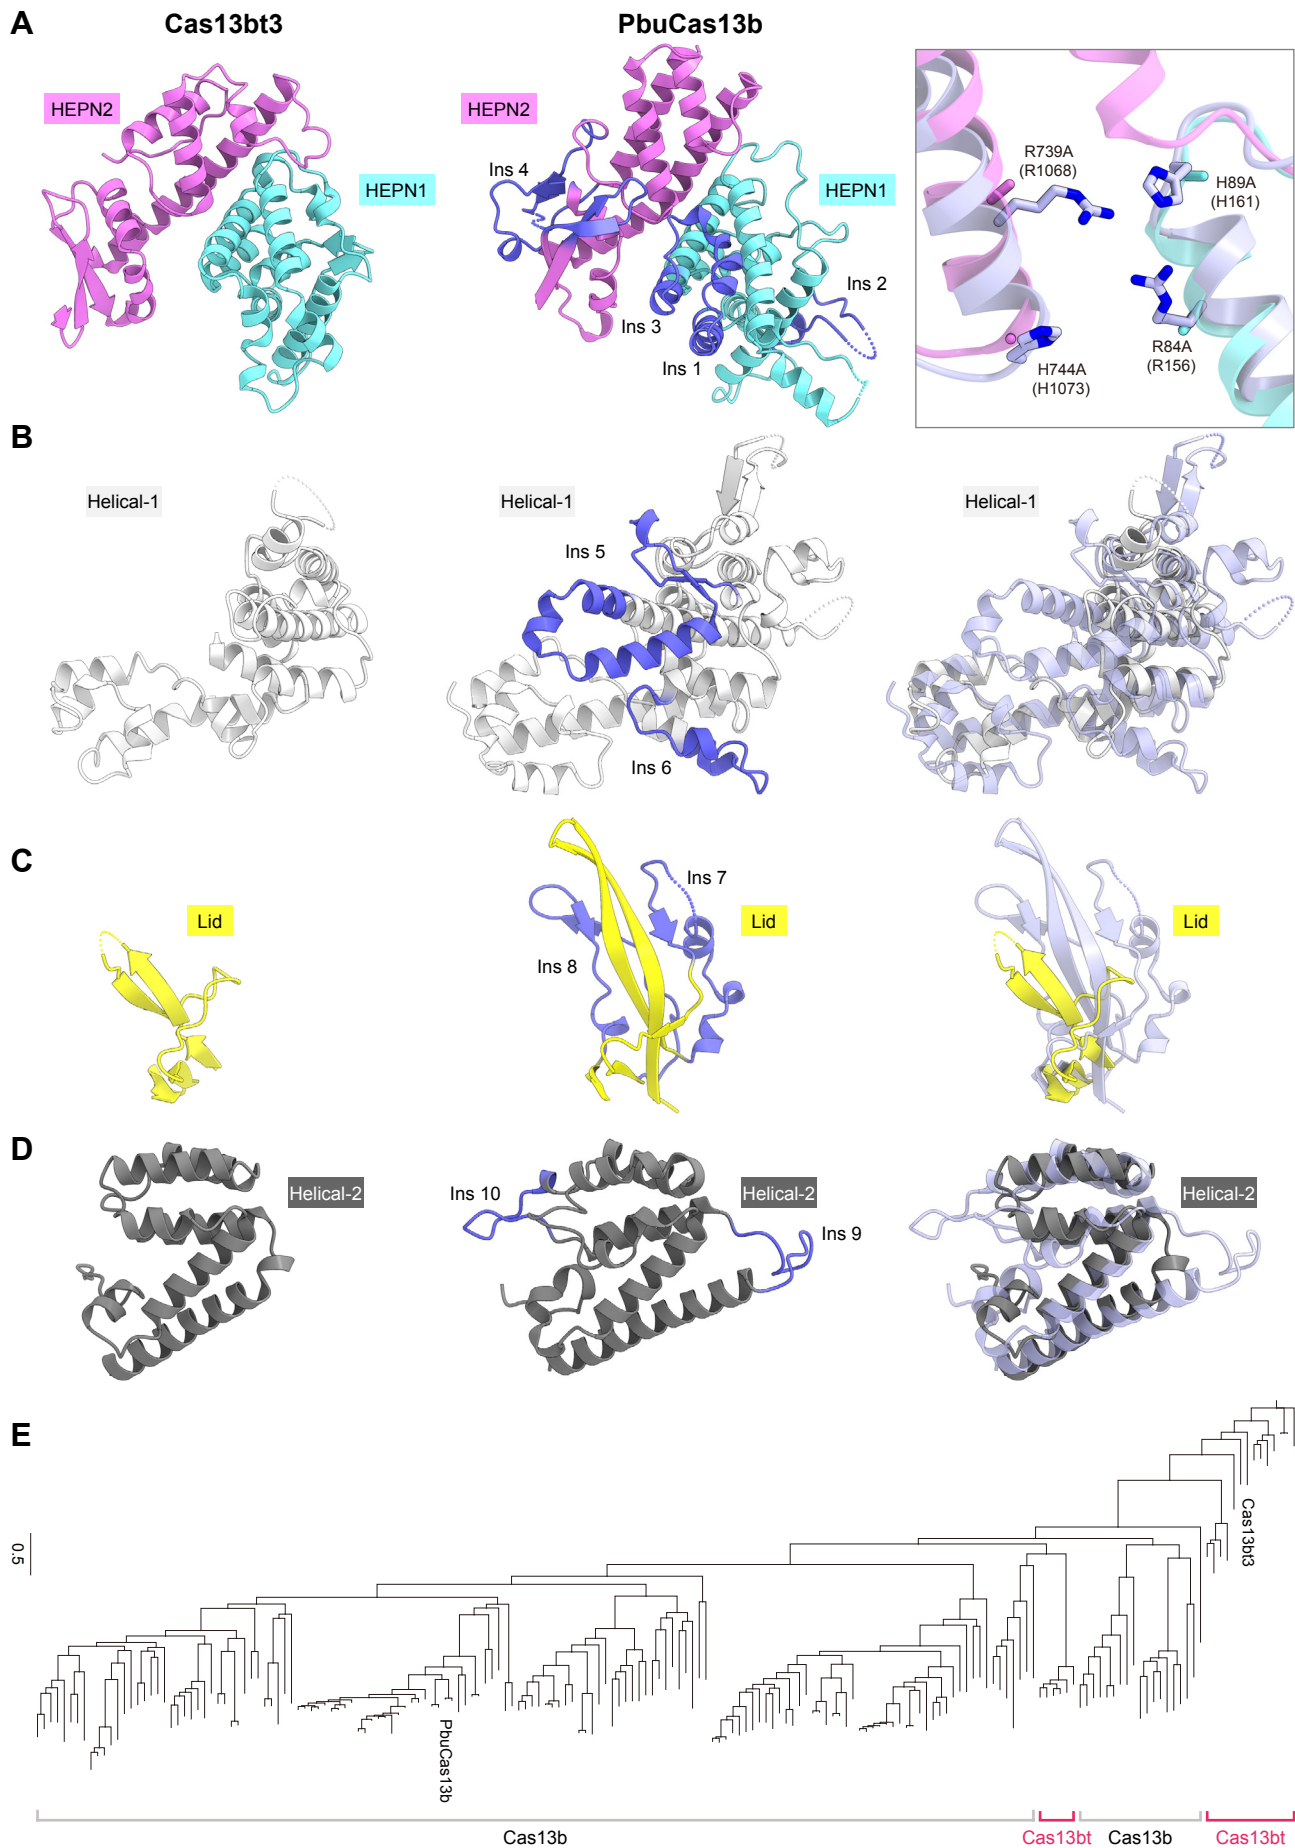

**Figure S1. Domain structures, Related to Figure 1**

(A–D) Structural comparison of the HEPN (A), Helical-1 (B), Lid (C), and Helical-2 (D) domains of binary complexes of Cas13bt3 and PbuCas13b (PDB: 6DTD). In the PbuCas13b structure, the PbuCas13b-specific insertions are highlighted in blue. PbuCas13b (light blue) is superimposed onto Cas13bt3. (E) Phylogenetic tree of Cas13b and Cas13bt proteins.

**A**

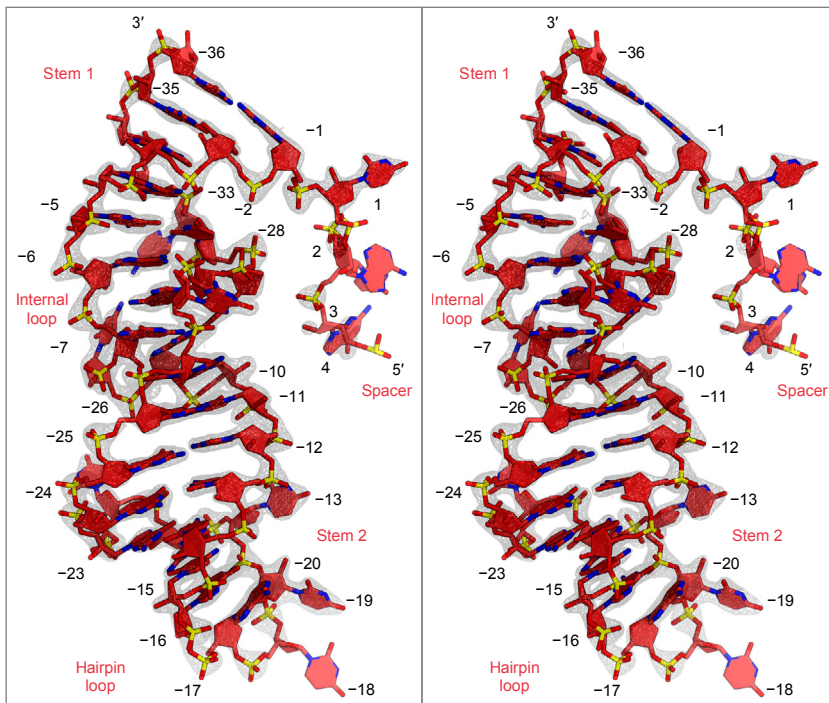

**B**

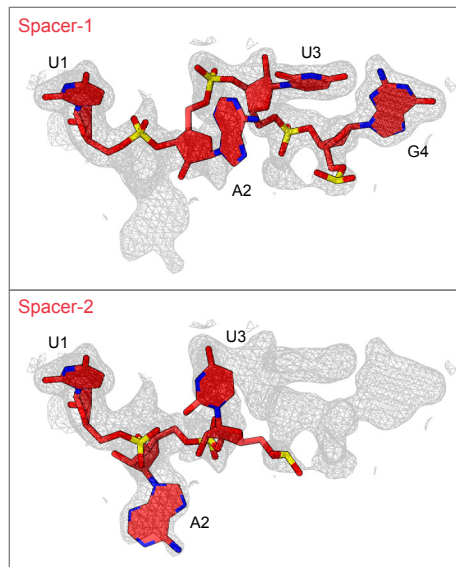

**C**

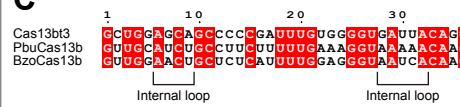

**D**

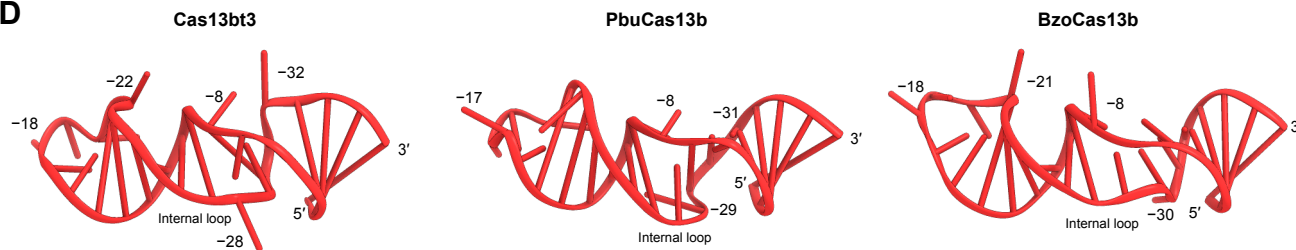

**E**

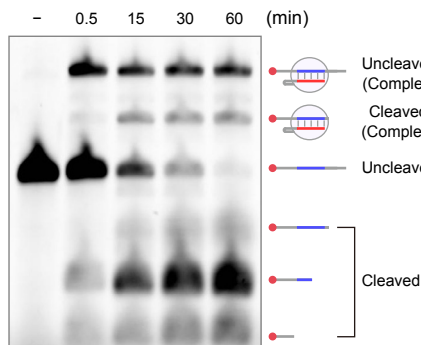

**G**

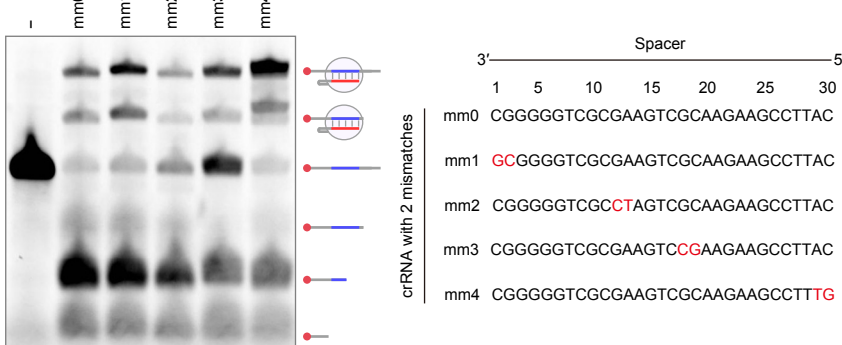

**F**

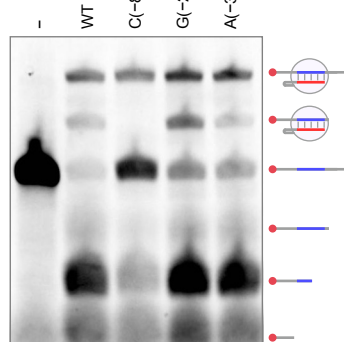

**H**

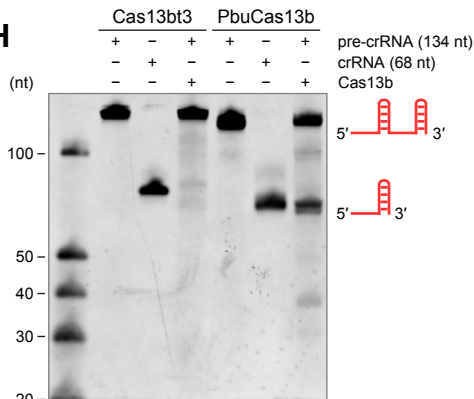

**I**

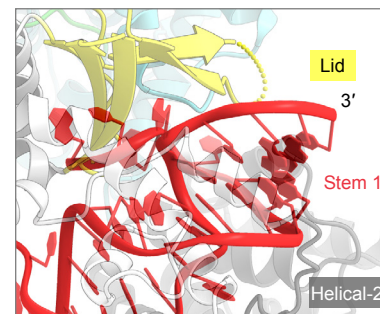

**Figure S2. crRNA structures, Related to Figure 2**

(A) *2mFo* - *DFc* electron density map for the crRNA in the binary complex (contoured at  $2.5\sigma$ ) (stereo view).

(B) *2mFo* - *DFc* electron density map for the spacer region in two distinct conformations (contoured at  $0.8\sigma$ ).

(C and D) Sequences (C) and structures (D) of the DR regions of the Cas13bt3, PbuCas13b (Slaymaker et al., 2019) (PDB: 6DTD), and BzoCas13b (Zhang et al., 2018) (PDB: 6AAY) crRNAs. The DR sequence of Cas13bt3 crRNA shares 58% and 67% identity with those of PbuCas13b and BzoCas13b, respectively.

(E) *In vitro* RNA cleavage experiments. The 5'-Cy5-labeled target RNA was incubated with the Cas13bt3-crRNA complex at 37°C for 0.5, 15, 30 and 60 min, and then analyzed by denaturing urea-PAGE.

(F and G) Effects of mutations in the DR (F) and spacer (G) regions of the crRNA. The 5'-Cy5-labeled target RNA was incubated with the Cas13bt3-crRNA complex (wild-type or mutant crRNAs) at 37°C for 60 min, and then analyzed by denaturing urea-PAGE.

(H) *In vitro* processing experiments. The pre-crRNA was incubated with Cas13bt3 at 37°C for 60 min, and then analyzed by denaturing urea-PAGE. PbuCas13b was used as a positive control.

(I) Location of the 3' end of the crRNA. Disordered regions are indicated as dotted lines.

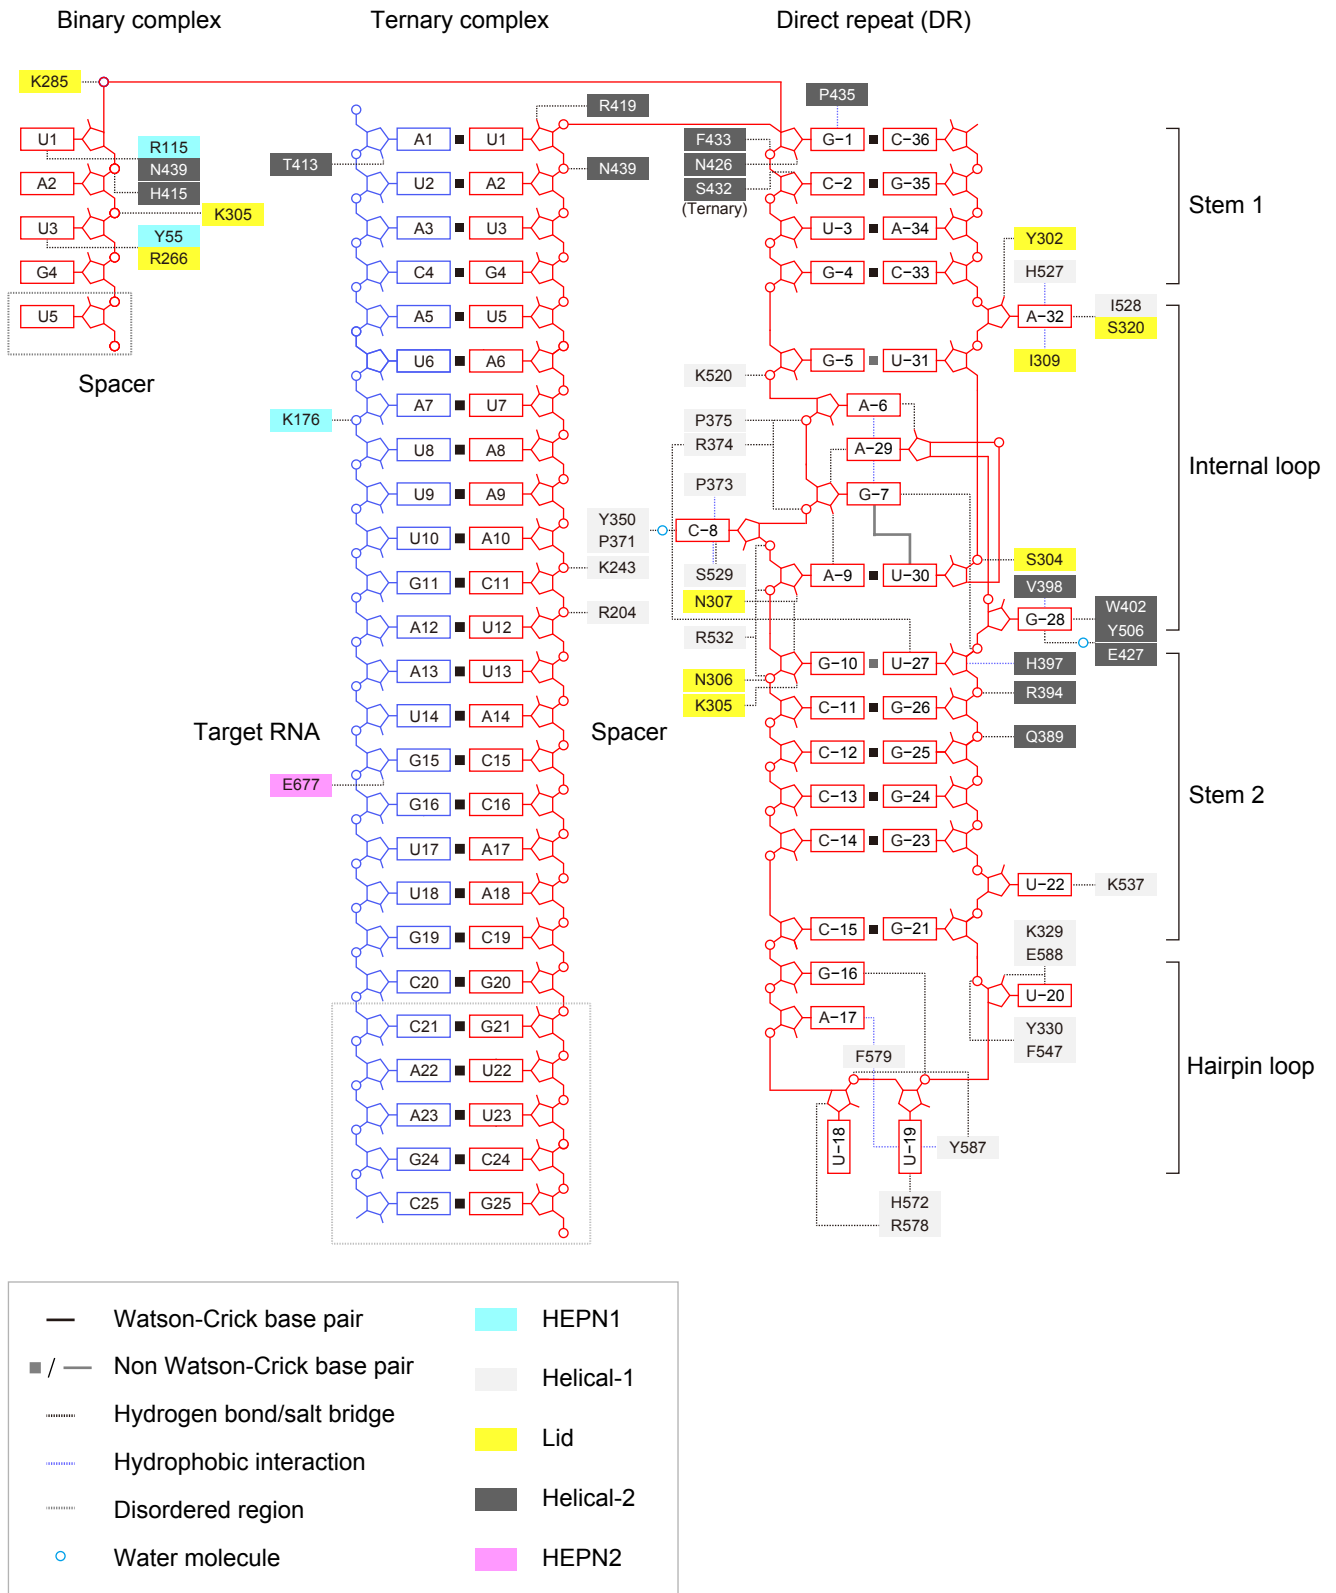

**Figure S3. Schematics of RNA recognition, Related to Figures 3 and 5**  
 The disordered regions are boxed by dashed grey lines.

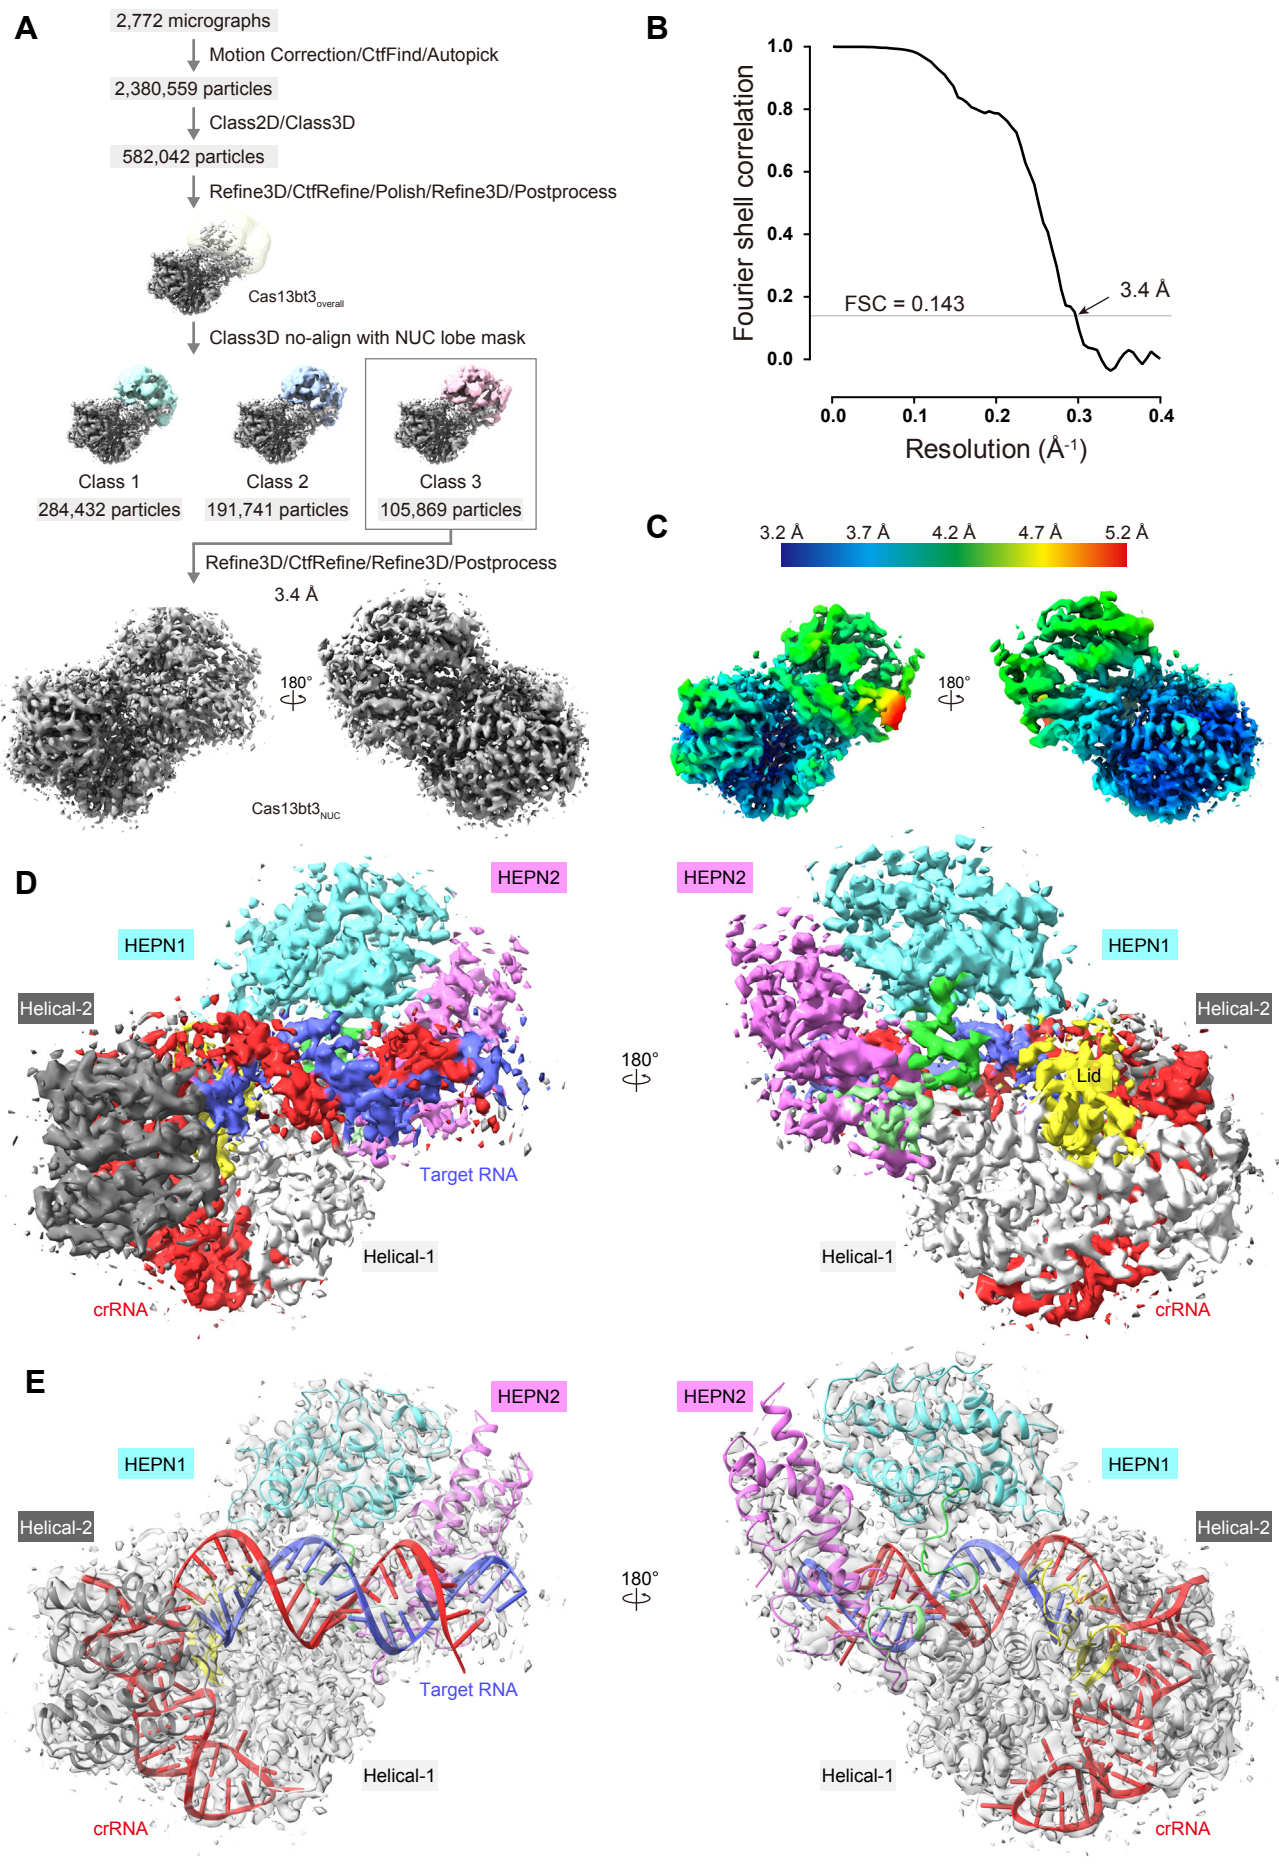

**Figure S4. Cryo-EM analysis of the Cas13bt3–crRNA–target RNA ternary complex, Related to Figure 4**

- (A) Single-particle cryo-EM image processing workflow.  
 (B) Fourier shell correlation curve for the 3D reconstruction.  
 (C) Local resolution of the cryo-EM density map.  
 (D and E) Cryo-EM density maps of the Cas13bt3–crRNA–target RNA ternary complex.

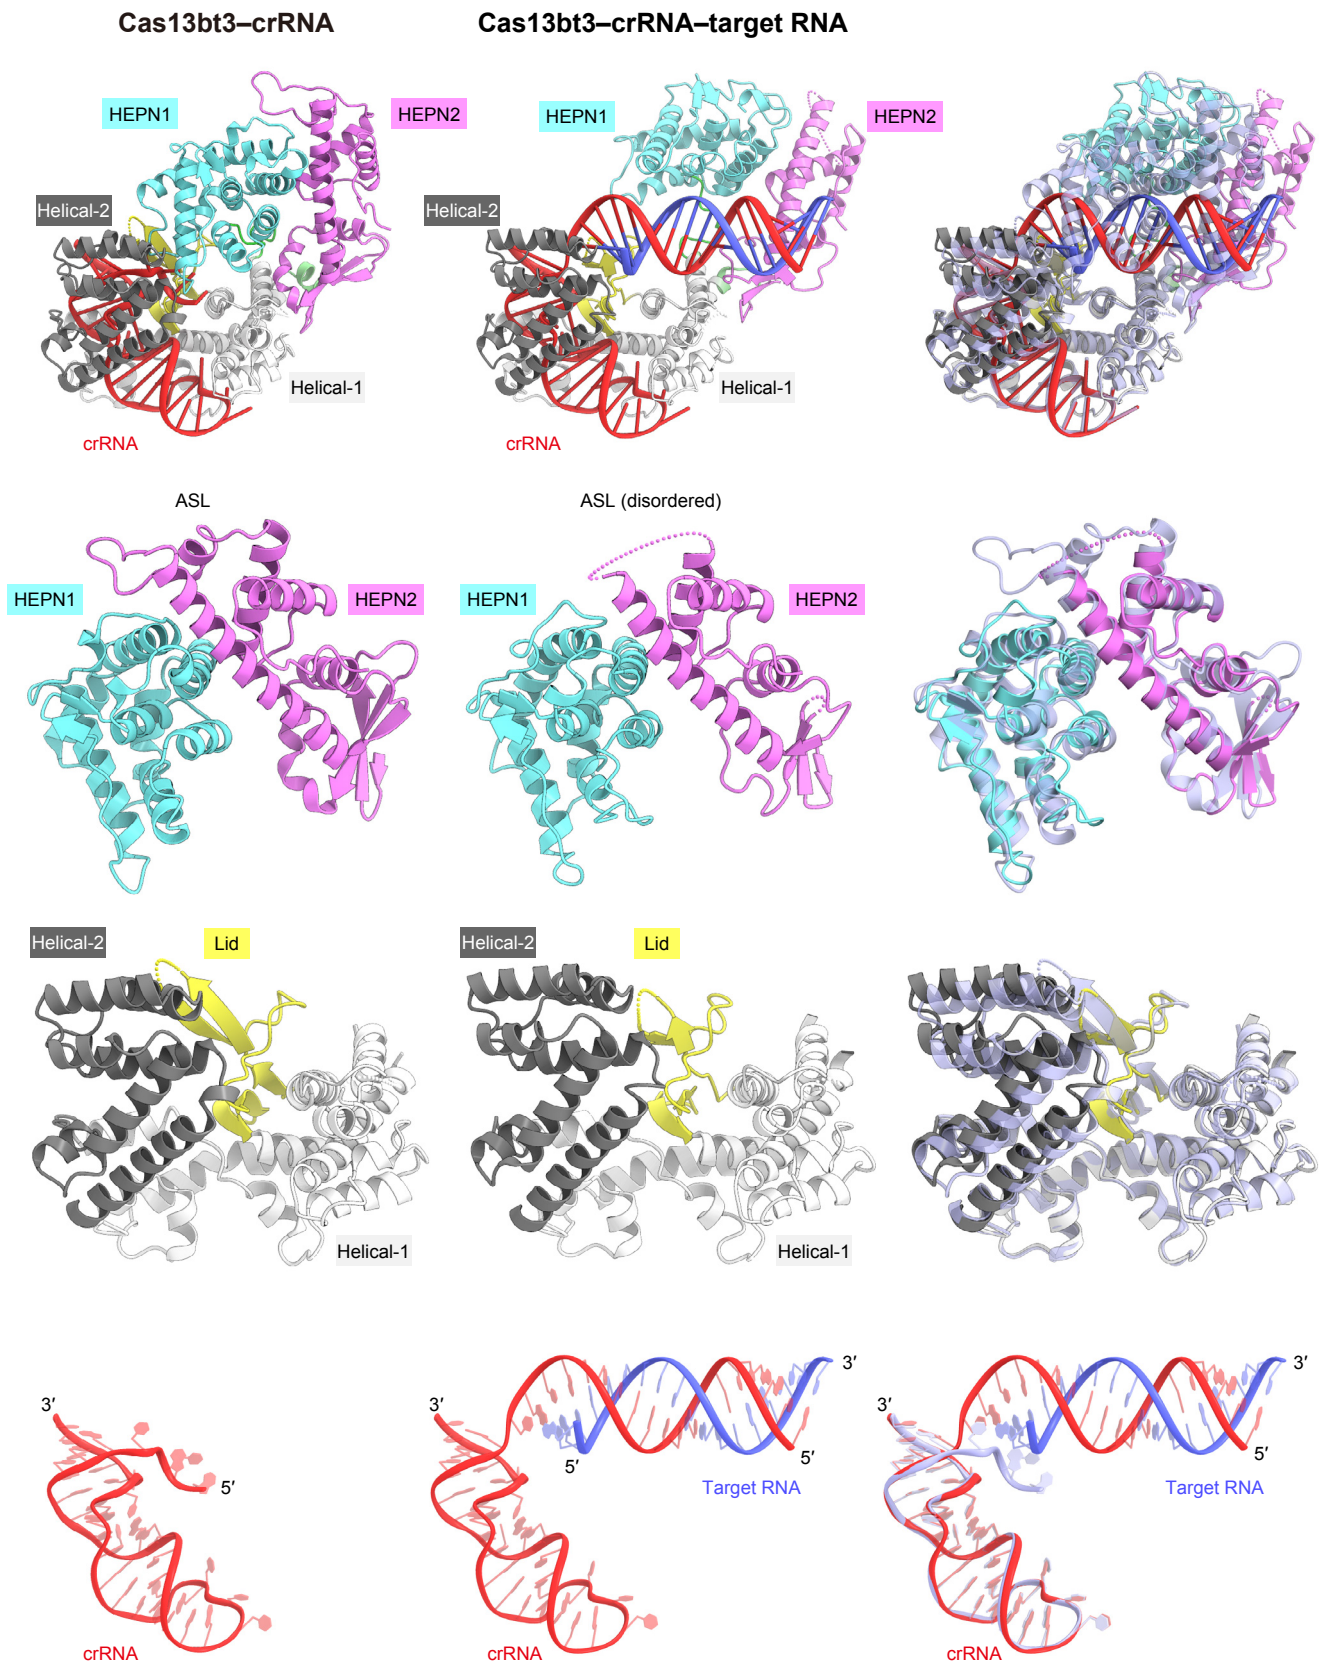

**Figure S5. Structural comparison between the Cas13bt3 binary and ternary complexes, Related to Figure 5**

Structures of the Cas13bt3–crRNA binary complex (left) and the Cas13bt3–crRNA–target RNA ternary complex (center). The binary complex (light blue) is superimposed onto the ternary complex (right).

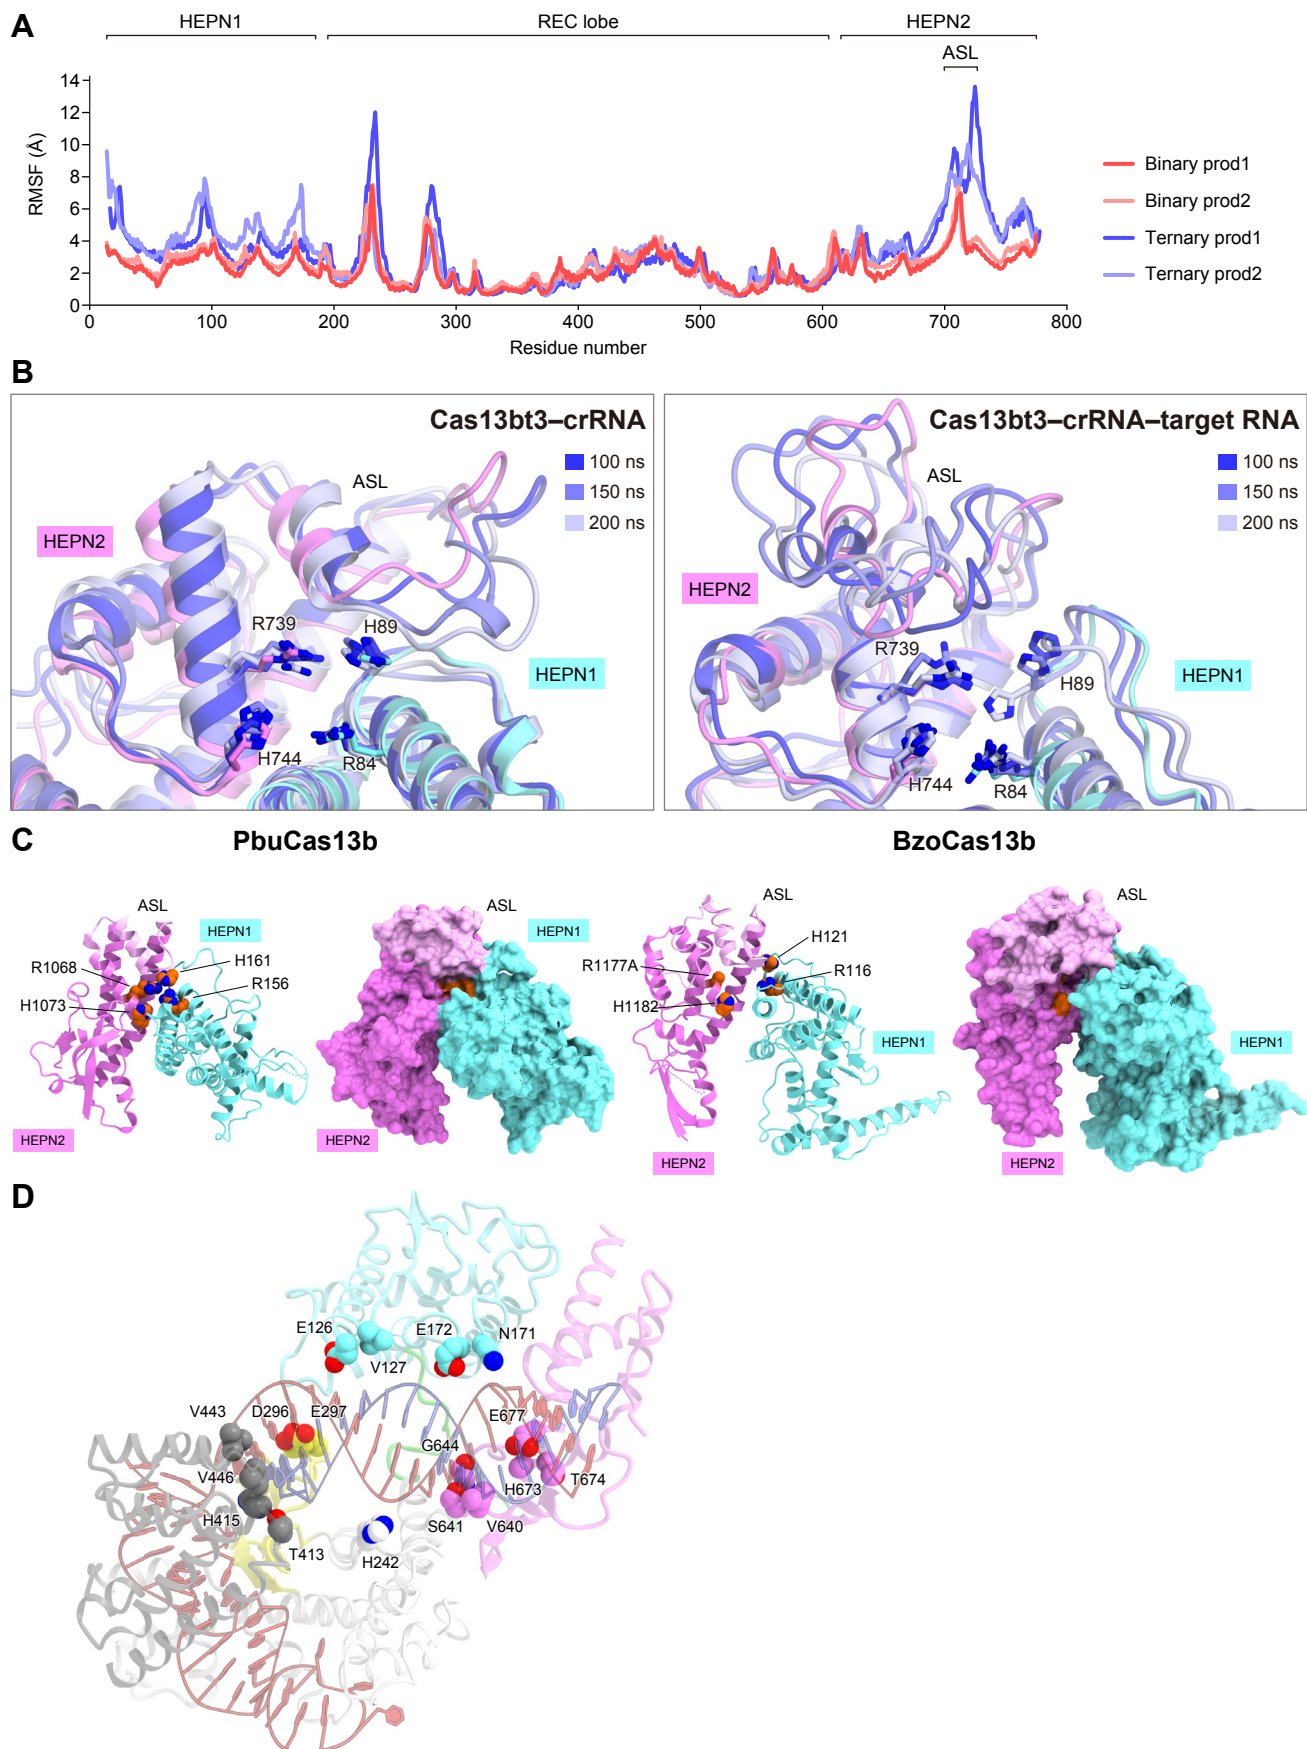

**Figure S6. Structural flexibility in the HEPN active site and molecular engineering, Related to Figure 6**

(A) MD simulations of the Cas13bt3 binary (red) and ternary (blue) complexes. RMSF values for equivalent C $\alpha$  atoms were calculated by aligning the structures based on their crRNA DR regions during 200-ns MD simulations.

(B) Superimposition of the HEPN active sites in the binary (left) and ternary (right) complexes after 100-, 150-, and 200-ns MD simulations.

(C) Structures of the HEPN domains of PbuCas13b and BzoCas13b.

(D) Mapping of the 17 residues onto the Cas13bt3-crRNA-target RNA complex. Since mutations, except for the E172R and E297F, did not substantially improve Cas13bt3-mediated RNA cleavage, we focused on the E172R and E297F mutations.



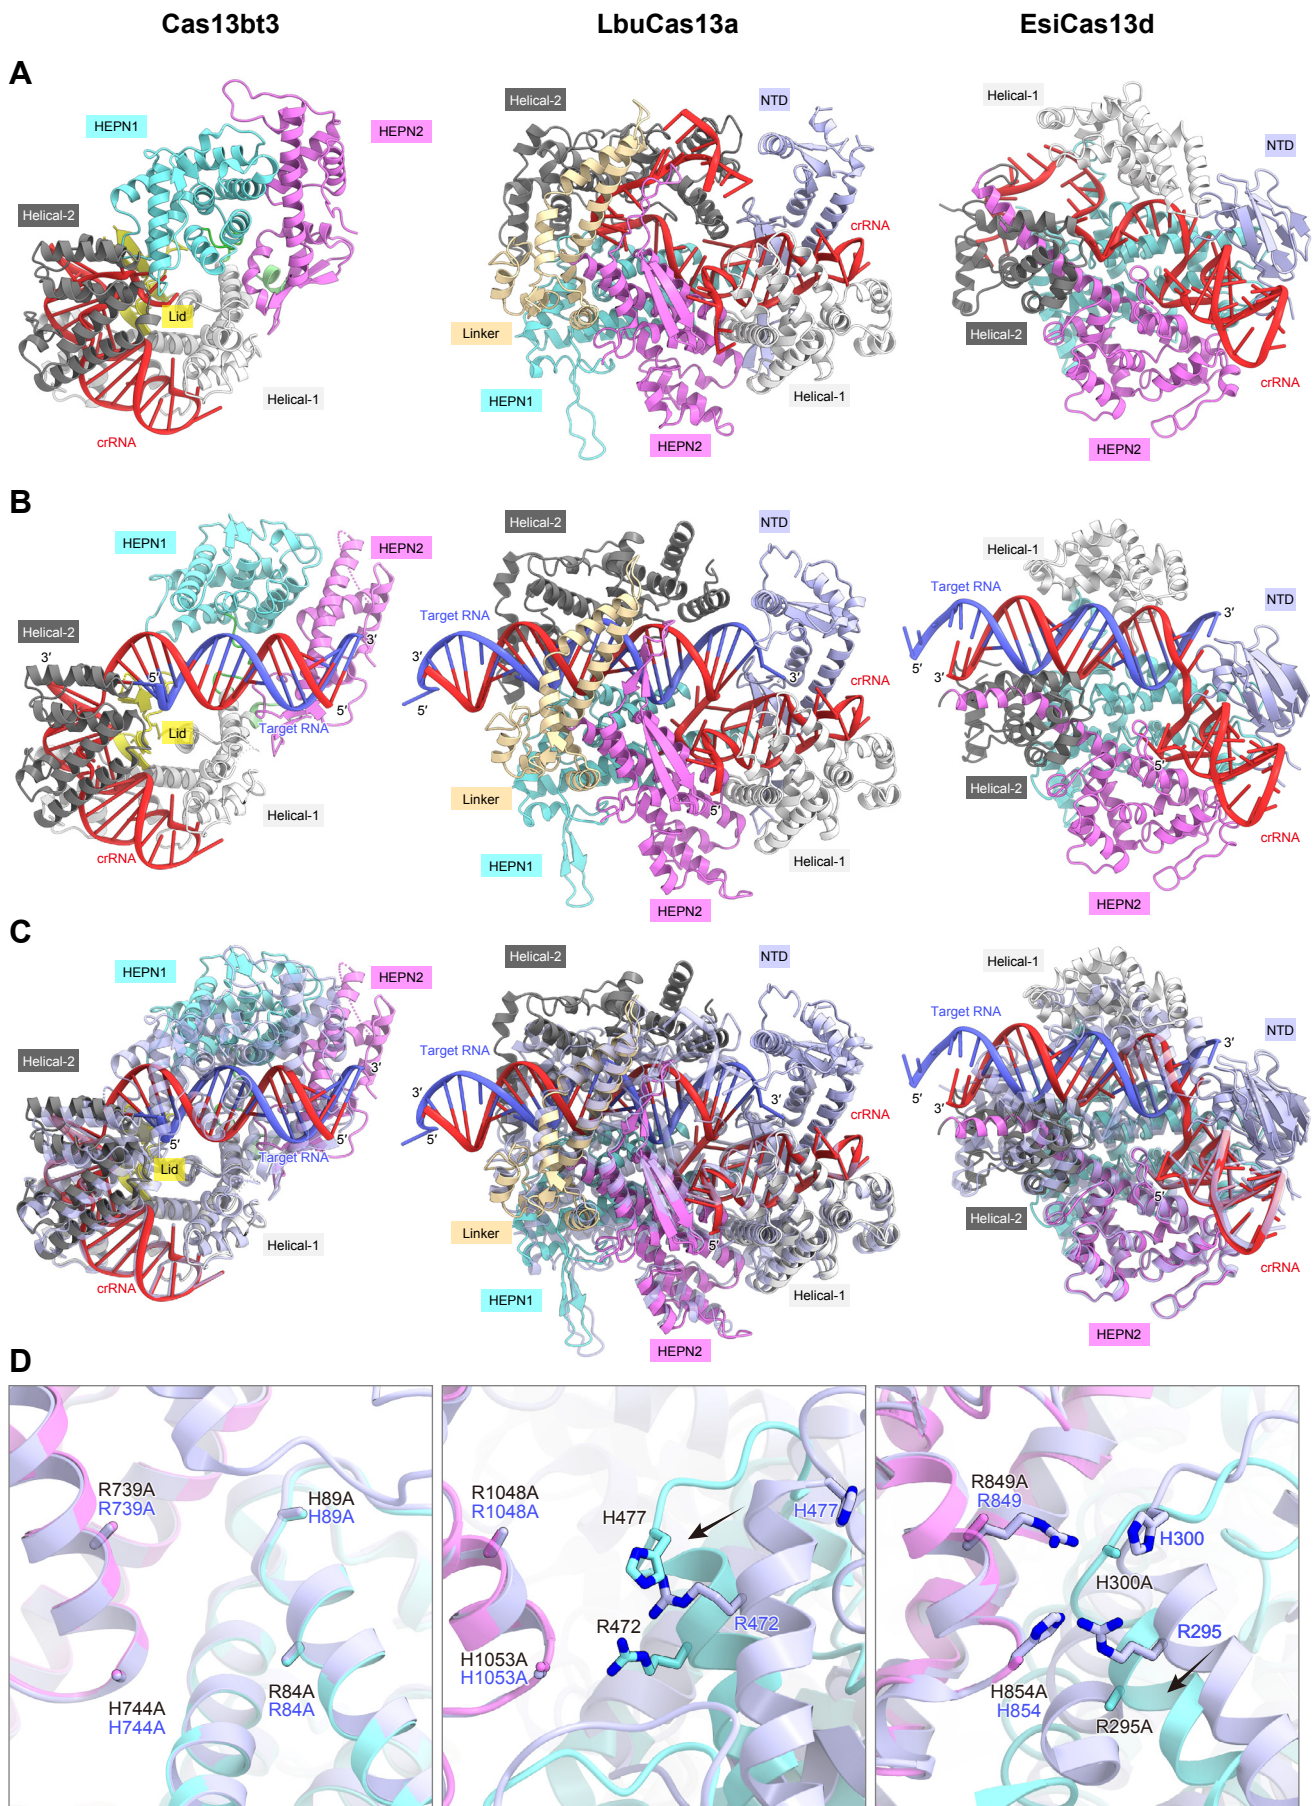

**Figure S7. Structural comparisons of Cas13bt3 with LbuCas13a and EsiCas13d, Related to Figure 7**

(A) Binary complex structures of Cas13bt3 (left), LbuCas13a (PDB: 5XWY) (center), and EsiCas13d (PDB: 6E9E) (right).

(B) Ternary complex structures of Cas13bt3 (left), LbuCas13a (PDB: 5XWP) (center), and EsiCas13d (PDB: 6E9F) (right).

(C and D) Superimposition of the overall structures (C) and the HEPN active sites (D) in the binary (light blue) and ternary (colored as in A) complexes of Cas13bt3, LbuCas13a, and EsiCas13d.

**Table S1. Nucleic-acid sequences used in this study, Related to STAR Methods**

| Oligonucleotides used to introduce the Cas13b3 mutations (pE-SUMO-His6-Cas13b3)        |                                                                                                                                                                       |                                                 |
|----------------------------------------------------------------------------------------|-----------------------------------------------------------------------------------------------------------------------------------------------------------------------|-------------------------------------------------|
| Mutation                                                                               | Forward primer                                                                                                                                                        | Reverse primer                                  |
| R84A/H89A                                                                              | TTCAGC <sup>gcc</sup> TACAGACACAGCCCCGGCTG                                                                                                                            | GTAGTT <sup>ggc</sup> CAGAGCCTCGGCCTTGGC        |
| R739A/H744A                                                                            | TTCTTT <sup>gcc</sup> CACCACCTGAAGTTCGTGATCGATG                                                                                                                       | GGCTCT <sup>ggc</sup> CACCTTTGTTACGGCGGTTTTTCTC |
| R122A                                                                                  | <sup>gcc</sup> AGAGAAACCGAAGTATCATCGAGTTCC                                                                                                                            | CCTGCACTCGAAGATGGCCC                            |
| R123A                                                                                  | <sup>gcc</sup> GAAACCGAAGTATCATCGAGTTCCC                                                                                                                              | CCGCCTGCACTCGAAGATGG                            |
| R155A                                                                                  | <sup>gcc</sup> AGAGTGCTGGACAGACTGTATGGC                                                                                                                               | TTCCACAAGAAGCTGACGAAGAACAC                      |
| R156A                                                                                  | <sup>gcc</sup> GTGCTGGACAGACTGTATGGCG                                                                                                                                 | GCGTCCACAAGAAGCTGACGAAG                         |
| K169A                                                                                  | <sup>gcc</sup> AAGAATGAGGGCCAGTACAAGCTGAC                                                                                                                             | CAGGCCGGACACGGCGC                               |
| K170A                                                                                  | <sup>gcc</sup> AATGAGGGCCAGTACAAGCTGACC                                                                                                                               | CTTCAGGCCGGACACGGCG                             |
| K645A                                                                                  | <sup>gcc</sup> CTGTATGTGCTGGACGACGCC                                                                                                                                  | GCCGTAGTCGGACACGCTGAAC                          |
| E172R                                                                                  | <sup>cgg</sup> GGCCAGTACAAGCTGACCCG                                                                                                                                   | ATTCTTCTCAGGCCGGACACGG                          |
| E297F                                                                                  | <sup>ttc</sup> GACCAGAGCTACTACATCAGCAAGAACAAC                                                                                                                         | GTCCTTCTTGAGAAGTCCACCACC                        |
| The crRNA and target RNA used for the structure determination                          |                                                                                                                                                                       |                                                 |
| crRNA                                                                                  | <u>GCUUGGCAACCAUUC<sup>AAU</sup>UAUGUAUGCUGGAGCAGCCCCCGAUUUGUGGGGUGAUUACAGC</u>                                                                                       |                                                 |
| Target RNA                                                                             | <u>AUACAUAUUUGAAUGGUUGCCAAGC</u>                                                                                                                                      |                                                 |
| crRNAs and target RNA used for the <i>in vitro</i> cleavage and processing experiments |                                                                                                                                                                       |                                                 |
| crRNA                                                                                  | <u>ggCAUUC<sup>CGAAGA</sup>ACGCGUGAAGCGCUGGGGGCGCUGGAGCAGCCCCCGAUUUGUGGGGUGAUUACAGC</u>                                                                               |                                                 |
| crRNA-C(-8)G                                                                           | <u>ggCAUUC<sup>CGAAGA</sup>ACGCGUGAAGCGCUGGGGGCGCUGGAG<sup>g</sup>AGCCCCCGAUUUGUGGGGUGAUUACAGC</u>                                                                    |                                                 |
| crRNA-G(-28)C                                                                          | <u>ggCAUUC<sup>CGAAGA</sup>ACGCGUGAAGCGCUGGGGGCGCUGGAGCAGCCCCCGAUUUGUGGGGUGAUUACAGC</u>                                                                               |                                                 |
| crRNA-A(-32)U                                                                          | <u>ggCAUUC<sup>CGAAGA</sup>ACGCGUGAAGCGCUGGGGGCGCUGGAGCAGCCCCCGAUUUGUGGGGUGAUUACAGC</u>                                                                               |                                                 |
| crRNA-mm1                                                                              | <u>ggCAUUC<sup>CGAAGA</sup>ACGCGUGAAGCGCUGGGGGCGCUGGAGCAGCCCCCGAUUUGUGGGGUGAUUACAGC</u>                                                                               |                                                 |
| crRNA-mm2                                                                              | <u>ggCAUUC<sup>CGAAGA</sup>ACGCGU<sup>atc</sup>CGCUGGGGGCGCUGGAGCAGCCCCCGAUUUGUGGGGUGAUUACAGC</u>                                                                     |                                                 |
| crRNA-mm3                                                                              | <u>ggCAUUC<sup>CGAAGA</sup>AG<sup>c</sup>CUGAAGCGCUGGGGGCGCUGGAGCAGCCCCCGAUUUGUGGGGUGAUUACAGC</u>                                                                     |                                                 |
| crRNA-mm4                                                                              | <u>gggtUUC<sup>CGAAGA</sup>ACGCGUGAAGCGCUGGGGGCGCUGGAGCAGCCCCCGAUUUGUGGGGUGAUUACAGC</u>                                                                               |                                                 |
| Target RNA                                                                             | <u>AAUUUGCCCCAGCGCUCAGCGUUCUUGGAAUUGCGCG</u>                                                                                                                          |                                                 |
| Pre-crRNA                                                                              | <u>ggCAUUC<sup>CGAAGA</sup>ACGCGUGAAGCGCUGGGGGCGCUGGAGCAGCCCCCGAUUUGUGGGGUGAUUACAGCCAUUC<sup>CGAAGA</sup>ACGCGUGAAGCGCUGGGGGCGCUGGAGCAGCCCCCGAUUUGUGGGGUGAUUACAGC</u> |                                                 |
| PbuCas13b-crRNA                                                                        | <u>ggCAUUC<sup>CGAAGA</sup>ACGCGGACAUUC<sup>CGAAGA</sup>ACGCGUUGCAUCUGCCUUCUUUUUGAAAGGUA<sup>AAAA</sup>ACAAC</u>                                                      |                                                 |
| PbuCas13b-pre-crRNA                                                                    | <u>ggCAUUC<sup>CGAAGA</sup>ACGCGGACAUUC<sup>CGAAGA</sup>ACGCGUUGCAUCUGCCUUCUUUUUGAAAGGUA<sup>AAAA</sup>ACAAC</u>                                                      |                                                 |
| crRNA used for mammalian RNA knockdown and editing assays                              |                                                                                                                                                                       |                                                 |
| Gaussia luciferase crRNA 1                                                             | <u>GGGCAUUGGCUCUCCAUUCUUGAGCACCCUGCUGGAGCAGCCCCCGAUUUGUGGGGUGAUUACAGC</u>                                                                                             |                                                 |
| Gaussia luciferase crRNA 2                                                             | <u>GGAAUGUCGACGAUCGCCUCGCCUAGCCGGCUGGAGCAGCCCCCGAUUUGUGGGGUGAUUACAGC</u>                                                                                              |                                                 |
| Cypridina luciferase X95W crRNA                                                        | <u>UUCUAAACCAUCCUGCGGCCUCUACUCUGCGCUGGAGCAGCCCCCGAUUUGUGGGGUGAUUACAGC</u>                                                                                             |                                                 |
| Non-targeting crRNA                                                                    | <u>GUAAUGCCUUGCUCGACGCAUAGUCUGCUGGAGCAGCCCCCGAUUUGUGGGGUGAUUACAGC</u>                                                                                                 |                                                 |

The codons for the mutations and the 5' GG for *in vitro* transcription are indicated with lower case letters. The guide/target sequences are underlined.
